# Supplementary material
Source: PubMed Central journal article supplement (PMC3981969)
Supplement: NIHMS567678-supplement-301315R3_Online_Data_Supplement.pdf [file NIHMS567678-supplement-301315R3_Online_Data_Supplement.pdf]

## Supplemental Material

### Detailed Methods

#### Antibodies and Reagents

Antibodies and reagents were purchased as follows: mouse anti Actin, mouse anti VE-cadherin and goat anti VE-cadherin antibodies (Santa Cruz); Src pY416, Src pY527, SHP2 (Cell Signaling); TXNIP (Invitrogen); Rat anti VE-cadherin (BD Biosciences Pharmingen) ; Phalloidin (Sigma-Aldrich); CSK pSer 364 (Abcam); Green fluorescent protein (Clontech)

#### Cell Culture and siRNA Transfection

Human umbilical vein endothelial cell (HUVEC) or bovine aortic endothelial cell (BAEC) were seeded onto gelatin-coated dishes maintained in Medium 200 or Medium 199 respectively (Cascade Biologics, Portland Or) with low serum growth supplement and 5% FBS as previously described<sup>1</sup>. Cells were used at passages 2 to 6. Cells were transiently transfected with siRNA (TXNIP targeted or control) or plasmids as described in the text. Transfection was performed using Opti-MEM I Reduced Serum Media (Invitrogen) and Lipofectamine 2000. Experiments were performed 24 hours post-transfection.

#### Western Blot and Immunoprecipitation

Cells were washed twice in ice-cold PBS and harvested in lysis buffer (20 mmol/L Tris pH7.5, 150mmol/L NaCl, 1 mmol/L EDTA, 1  $\mu$ mol/L EGTA, 1% Triton X-100, 2.5  $\mu$ mol/L sodium pyrophosphate, 1  $\mu$ mol/L  $\beta$ -glycerolphosphate, 100 mmol/L NaVO<sub>4</sub>, 1 mol/L NaF and protease inhibitor cocktail). Immune complex samples were separated by SDS-PAGE, transferred to nitrocellulose, and incubated with appropriate primary antibodies (overnight; 4°C). After washing and incubation with secondary antibodies (LiCor Biosciences, Lincoln NE), immunoreactive proteins were visualized with the Odyssey LiCor Infrared Imaging System. Densitometry of blots was performed using Image J software (version 1.36b, National Institutes of Health).

#### Reference

1. Yamawaki H, Haendeler J, Berk BC. Thioredoxin: a key regulator of cardiovascular homeostasis. *Circ Res*. Nov 28 2003;93:1029-1033.

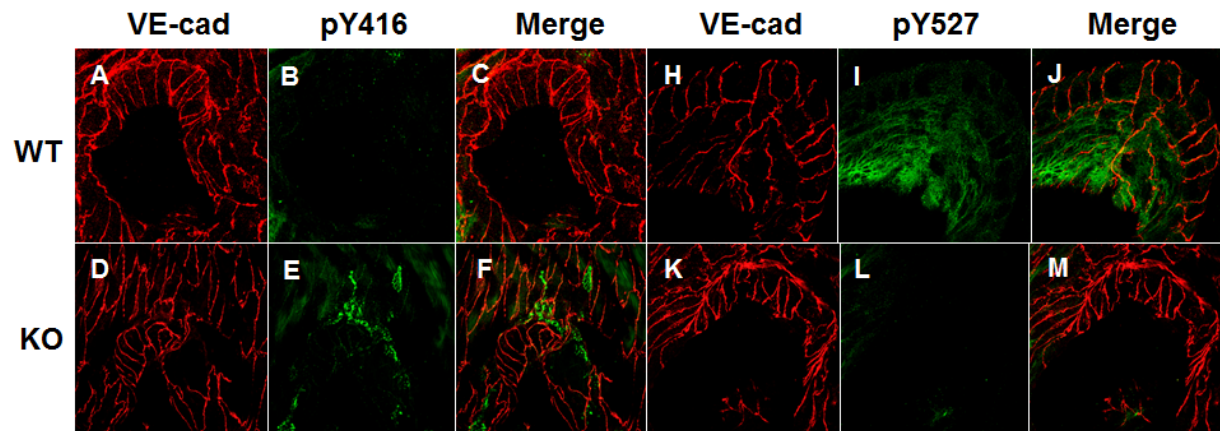

### Supplemental Figure I

*En face* staining demonstrates differential regulation of Src pY416 and pY527 in KO animals compared to control. Aortas of control (**A-C**; **H-J**) or KO (**D-F**; **K-M**) were immuno-stained for VE-cadherin (**A**, **D**, **H**, **K**), Src pY416 (**B**, **E**), Src pY527 (**I**, **L**) or presented as merged images (**C**, **F**, **J**, **M**).

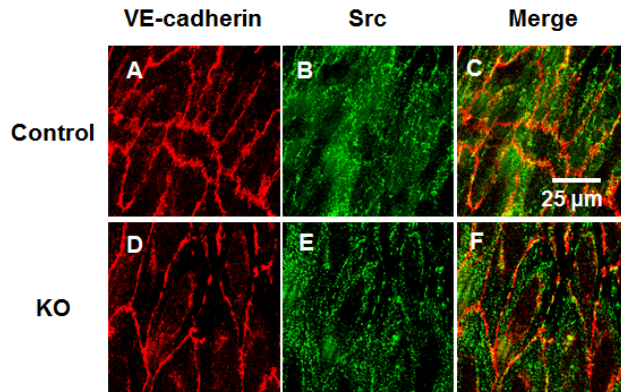

**Supplemental Figure II**

*En face* staining demonstrates equal amounts of Src in control and KO animals.

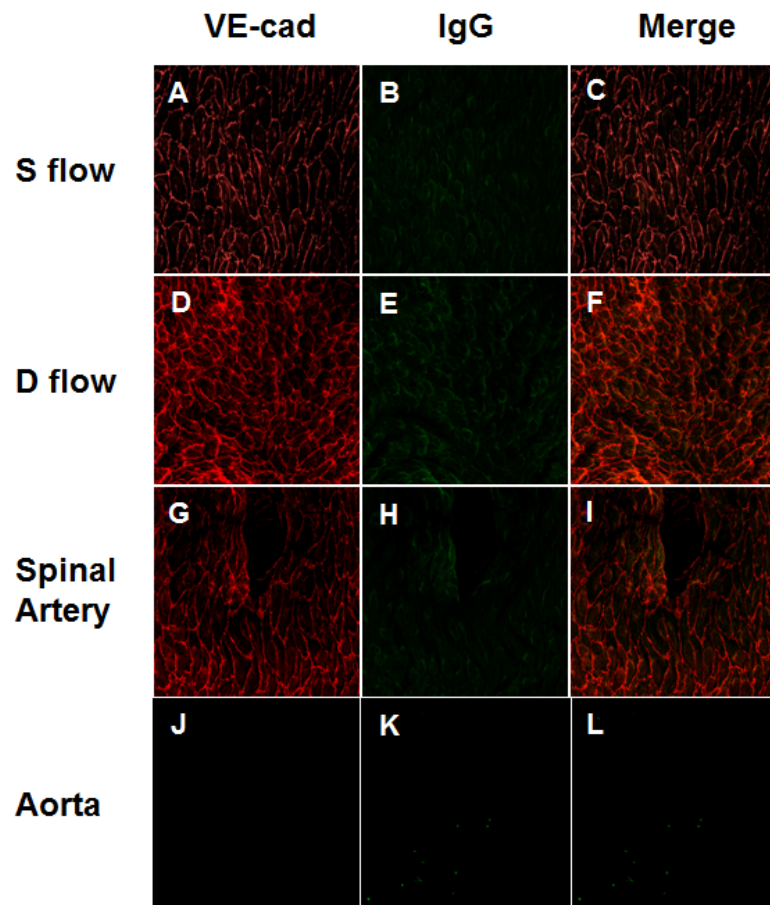

### Supplemental Figure III

Negative controls for *En face* staining demonstrate low green channel background in various regions of the aorta: s-flow, d-flow and spinal artery exit. Aortas were stained for VE-cadherin (**A, D, G**), IgG control (**B, E, H**), or no antibody and no IgG (**J, K**) or presented as merged images (**C, F, I, L**). No significant background signals were observed.

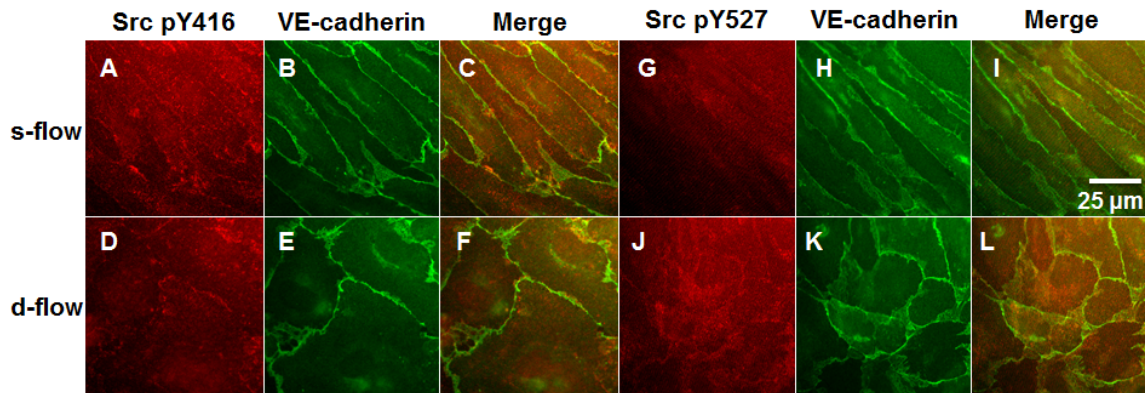

#### Supplemental Figure IV

Immunofluorescence assay demonstrate different cellular distribution and phosphorylation state of Src in response to flow. HUVEC exposed to s-flow (**A-C & G-I**) or d-flow (**D-F & J-L**) were immuno-stained for pY416 (**A, D**), pY527 (**G, J**), VE-cadherin (**B, E, H, K**) or merged (**C, F, I, L**). (N=4).

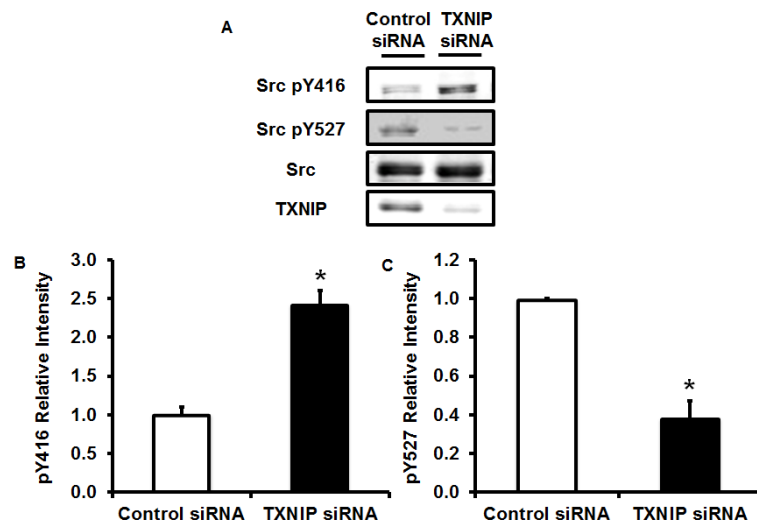

### Supplemental Figure V

Western blot analysis demonstrates Src pY416 is regulated by TXNIP expression. HUVEC transfected with control siRNA or TXNIP siRNA (**A**) were left untreated and immuno-blotted for pY416, pY527, Src and TXNIP. (**B, C**) Quantification of the data using Image J (\*  $P < 0.05$  vs. control siRNA;  $n = 3$ ).

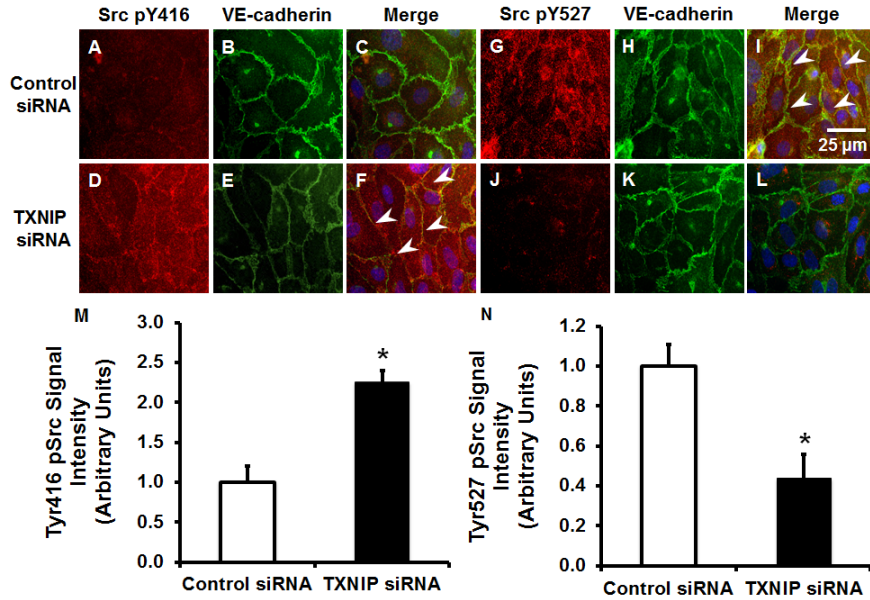

### Supplemental Figure VI

Immunofluorescence assay demonstrate different cellular distribution and phosphorylation state of Src after TXNIP depletion. HUVEC transfected with control siRNA (**A-C & G-I**) or TXNIP siRNA (**D-F & J-L**) were left untreated and immuno-stained for pY416 (**A, D**), pY527 (**G, J**), VE-cadherin (**B, E, H, K**) or merged (**C, F, I, L**). (**M, N**) Quantification of the data using Image J show pSrc intensity (\*  $P < 0.05$  vs. control siRNA;  $n = 4$ ).

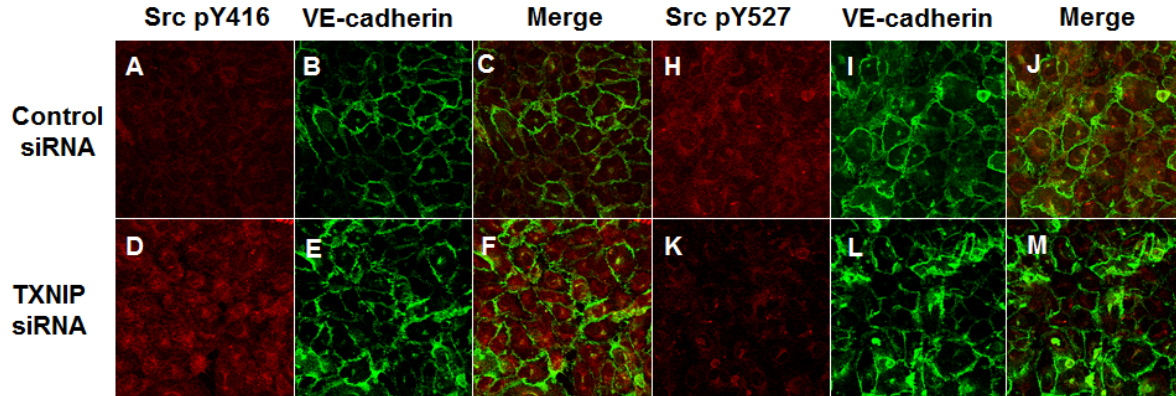

### Supplemental Figure VII

Confocal microscopy demonstrates different cellular distribution and phosphorylation state of Src after TXNIP depletion. HUVEC transfected with control siRNA (**A-C & H-J**) or TXNIP siRNA (**D-F & K-M**) were left untreated and immuno-stained for pY416 (**A, D**), pY527 (**H, K**), VE-cadherin (**B, E, I, L**) or merged (**C, F, J, M**).



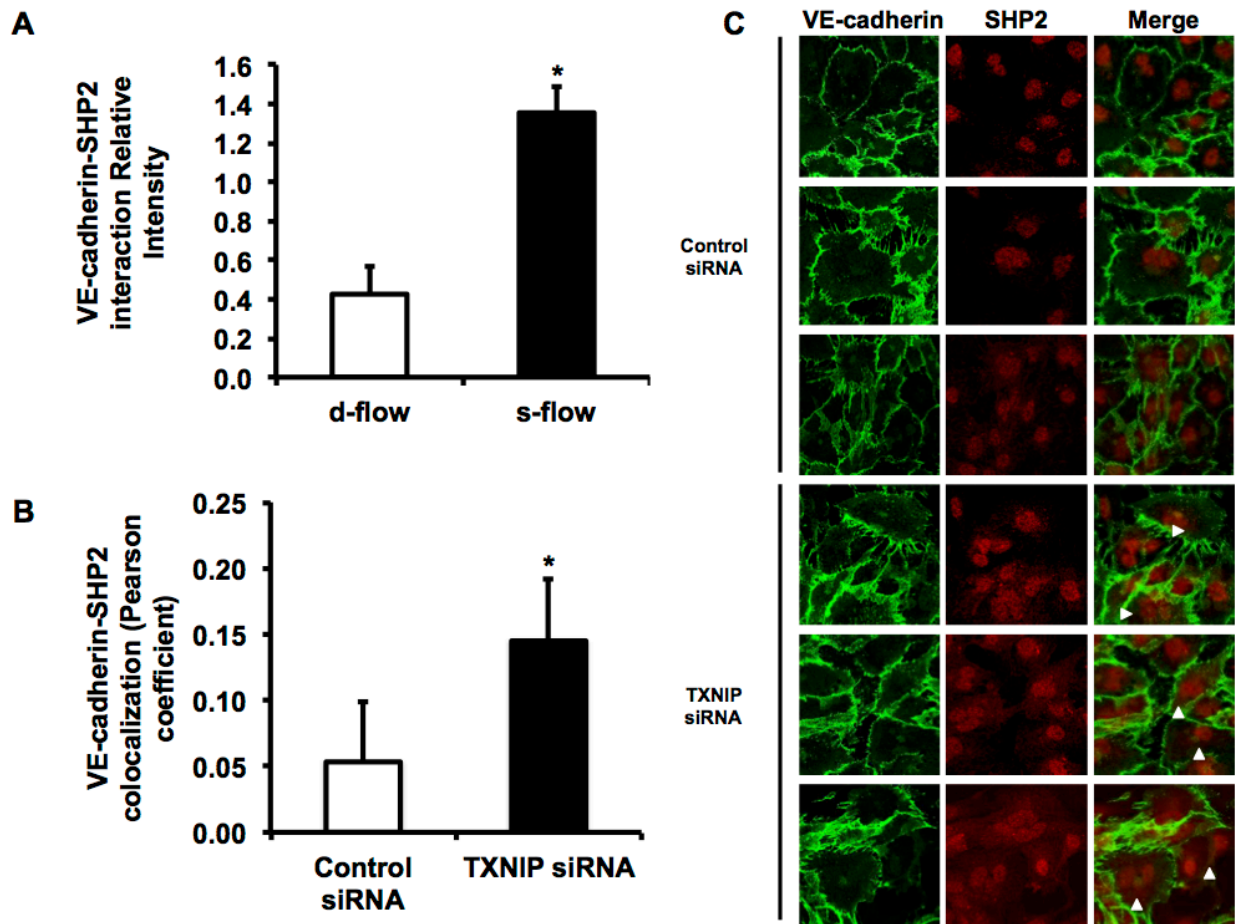

**Supplemental Figure VIII**

**(A)** Quantification of VE-cadherin-SHP2 interaction under s- or d-flow conditions (\*  $P < 0.05$  vs. control siRNA;  $n = 3$ ). **(B)** Colocalization quantification using ImageJ of VE-cadherin-SHP2 shown in panels C (\*  $P < 0.05$  vs. control siRNA;  $n = 3$ ). **(C)** SHP2 subcellular localization after transfection of Control or TXNIP siRNA. White arrowheads demonstrate areas of SHP2 redistribution and colocalization.

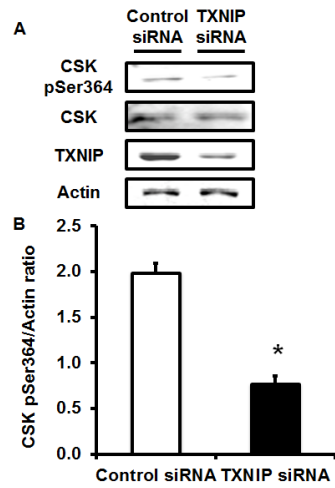

### Supplemental Figure IX

Western blot analysis demonstrates CSK pSer364 is regulated by TXNIP expression. HUVEC transfected with control siRNA or TXNIP siRNA (**A**) were left untreated and immuno-blotted for CSK pSer364. (**B**) Quantification of the data using Image J (\*  $P < 0.05$  vs. control siRNA;  $n = 3$ ).

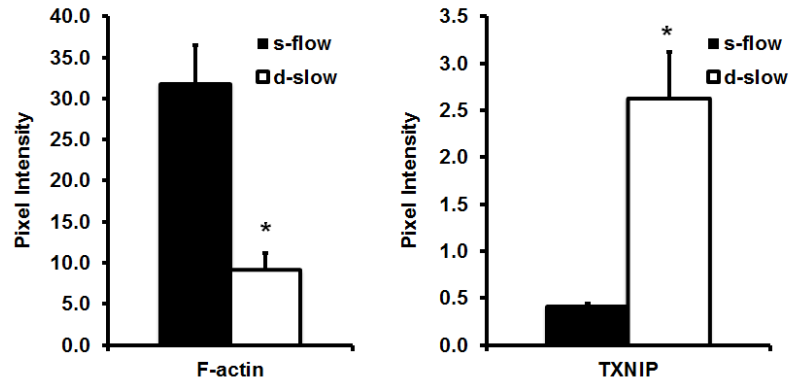

### Supplemental Figure X

Quantification of *in vivo* stress fiber formation and TXNIP expression experiments demonstrate differential regulation of TXNIP and stress fibers in s-flow and d-flow regions (\*  $P < 0.05$  vs. s-flow,  $n=5$ ).

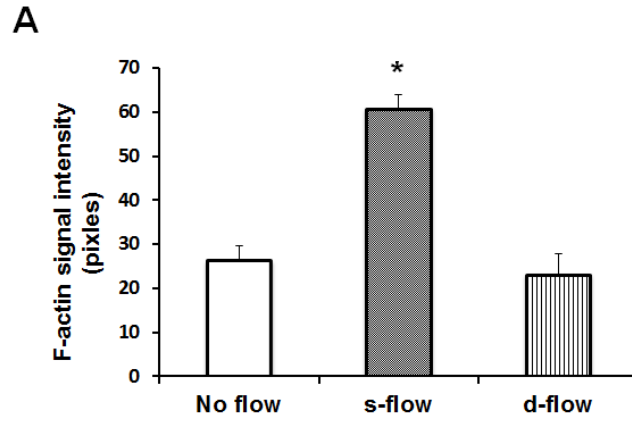

### Supplemental Figure XI

Quantification of *in vitro* stress fiber formation experiments demonstrate differential regulation of TXNIP and stress fibers in response to no flow, s-flow and d-flow conditions (\*  $P < 0.05$  vs. control siRNA,  $n = 5$ ).
